# Supplementary material for: A Pilot Study on Pharmacists’ Knowledge, Attitudes and Practices towards Medication Dysphagia via Asynchronous Online Focus Group Discussion
Source: MDPI journal article supplement (doi:10.3390/ijerph20042858), 2023-02-06
Supplement: s1 [file s1]

**Table S1. Table of Comparison of Platforms Evaluated.** Initial cut-off criteria included Platform-provided Hosting and Browser-based. Key criteria for further evaluation included Asynchronous Discussion, Participant Anonymity, Controlled User Access (by password-controlled or invite-only access), Deletion of Data on Request, and Data Collected Not Sold.

| <b>Platform</b>         | <b>Platform-provided Hosting</b> | <b>Browser-based</b> | <b>Asynchronous Discussion</b> | <b>Anonymity</b> | <b>Controlled User Access</b> | <b>Deletion of Data on Request</b> | <b>Data Collected Not Sold</b> | <b>Threading and Nested Replies</b> | <b>Downloadable Responses</b> |
|-------------------------|----------------------------------|----------------------|--------------------------------|------------------|-------------------------------|------------------------------------|--------------------------------|-------------------------------------|-------------------------------|
| <i>FocusGroupIt</i>     | ✓                                | ✓                    | ✓                              | ✓ *              | ✓                             | ✓                                  | ✓                              | ✓                                   | ✓                             |
| <i>NowComment</i>       | ✓                                | ✓                    | ✓                              | ✓ ^              | ✓                             | ✓                                  | ✓                              | ✓                                   | ---                           |
| <i>Discourse</i>        | ✓                                | ✓                    | ✓                              | ✓                | ✓                             | ✓                                  | ✓                              | ✓                                   | ---                           |
| <i>Ning</i>             | ✓                                | ✓                    | ✓                              | ---              | ✓                             | ✓                                  | ✓                              | ---                                 | ---                           |
| <i>Microsoft Teams</i>  | ✓                                | ✓<br>(App optional)  | ✓                              | ✗                | ✓                             | ✓                                  | ✓                              | ✓                                   | ---                           |
| <i>Collabito</i>        | ✓                                | ✓                    | ✓                              | ✗                | ---                           | ✓                                  | ✓                              | ✓                                   | ✓                             |
| <i>BackChannel Chat</i> | ✓                                | ✓                    | ✗                              | ✓                | ✓                             | ---                                | ✓                              | ---                                 | ✗                             |
| <i>ListServ</i>         | ✓                                | ✓                    | ✓                              | ✗                | ✗                             | ---                                | ---                            | ✓                                   | ✓                             |
| <i>VBulletin Cloud</i>  | ✓                                | ---                  | ✓                              | ---              | ✓                             | ---                                | ✓                              | ✓                                   | ✓                             |
| <i>Itracks</i>          | ---                              | ✗<br>(App required)  |                                |                  |                               |                                    |                                |                                     |                               |
| <i>Invision</i>         | ✗                                |                      |                                |                  |                               |                                    |                                |                                     |                               |
| <i>FluxBB</i>           | ✗                                |                      |                                |                  |                               |                                    |                                |                                     |                               |
| <i>phpBB</i>            | ✗                                |                      |                                |                  |                               |                                    |                                |                                     |                               |

\* Pseudonym (manually) with free plan; option with paid plan

^ Pseudonym (manually)
